# Supplementary material for: Multiplexed Illumina sequencing libraries from picogram quantities of DNA
Source: PubMed Central journal article supplement (PMC3711846; doi:10.1186/1471-2164-14-466), 2013-07-09
Supplement: 1471-2164-14-466-S1.pdf [file 1471-2164-14-466-S1.pdf]

## Oligo sequences

Oligonucleotides were synthesized by Integrated DNA Technologies with phosphorothioate (\*) linkages or 5' phosphate (Phos) as indicated, and HPLC purified. Index/barcode sequence is in **bold**. Oligo design is based on sequences from Illumina: Oligonucleotide sequences © 2007-2011 Illumina, Inc. All rights reserved. Derivative works created by Illumina customers are authorized for use with Illumina instruments and products only. All other uses are strictly prohibited.

Universal adapters:

A.U1:

5'-ACACTCTTTCCCTACACGACGCTCTTCCGATC\*T-3'

A.U2:

5'-Phos/GATCGGAAGAGCACACGTCTGAACTCCAGTCAC-3'

Index primers:

PCR.1:

5'-CAAGCAGAAGACGGCATAACGAGAT**CGTGAT**GTGACTGGAGTTCAGACGTGTGCTCTTCCGATC\*T-3'

PCR.2:

5'-CAAGCAGAAGACGGCATAACGAGAT**ACATCGG**TGACTGGAGTTCAGACGTGTGCTCTTCCGATC\*T-3'

PCR.3:

5'-CAAGCAGAAGACGGCATAACGAGAT**GCCTAAG**TGACTGGAGTTCAGACGTGTGCTCTTCCGATC\*T-3'

PCR.4

5'-CAAGCAGAAGACGGCATAACGAGAT**TGGTCA**GTGACTGGAGTTCAGACGTGTGCTCTTCCGATC\*T-3'

PCR.5

5'-CAAGCAGAAGACGGCATAACGAGAT**CACTGT**GACTGGAGTTCAGACGTGTGCTCTTCCGATC\*T-3'

PCR.6

5'-CAAGCAGAAGACGGCATAACGAGAT**ATTGGC**GTGACTGGAGTTCAGACGTGTGCTCTTCCGATC\*T-3'

Universal primer:

PCR.U

5'-AATGATACGGCGACCACCGAGATCTACACTCTTTCCCTACACGACGCTCTTCCGATC\*T-3'
